# Supplementary material for: Characterizing the Effects of Calcium and Prebiotic Fiber on Human Gut Microbiota Composition and Function Using a Randomized Crossover Design—A Feasibility Study
Source: MDPI journal article supplement (doi:10.3390/nu13061937), 2021-06-04
Supplement: s1 [file s1]

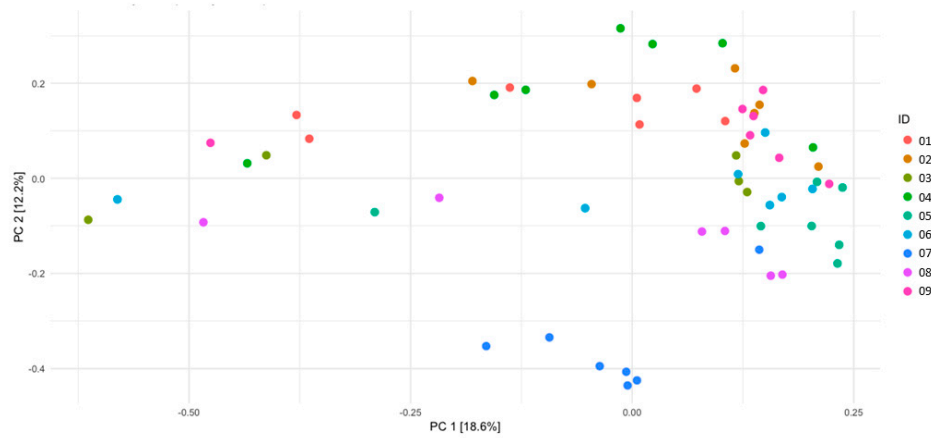

**Figure S1.** PCoA assessing beta diversity of the microbiome according to the participants (ID) enrolled. Axes correspond to principle coordinates displaying the maximum amount of variance (%) in the dataset. ( $n = 9$  for all sample collections except for the final washout,  $n = 7$ , and inulin 2,  $n = 8$ ).

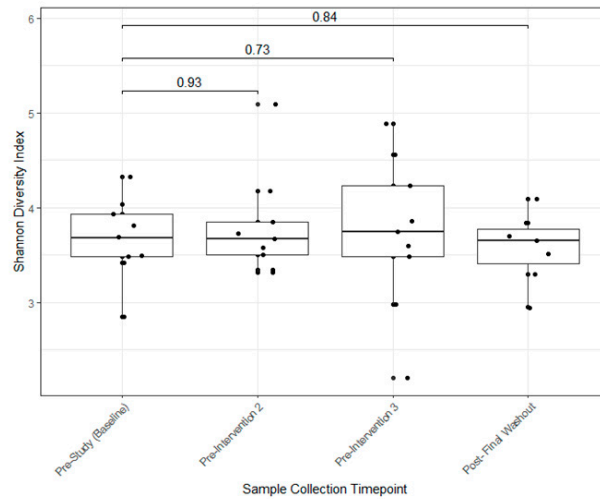

**Figure S2.** Alpha diversity measured by Shannon Diversity Index at Baseline, Pre-Intervention 2, Pre-Intervention 3, and Post-Final Washout.  $P$ -values are presented for paired  $t$ -test.

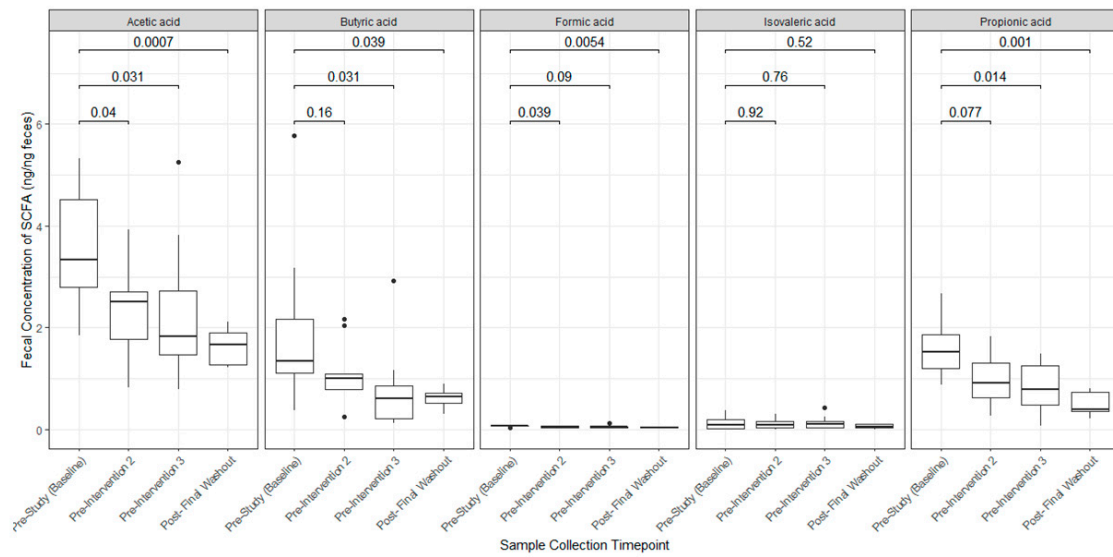

**Figure S3.** Short-Chain Fatty Acid (SCFA) concentrations (ng/ng feces) measured at Baseline, Pre-Intervention 2, Pre-Intervention 3, and Post-Final Washout. *P*-values are presented for paired *t*-test for the five SCFAs.

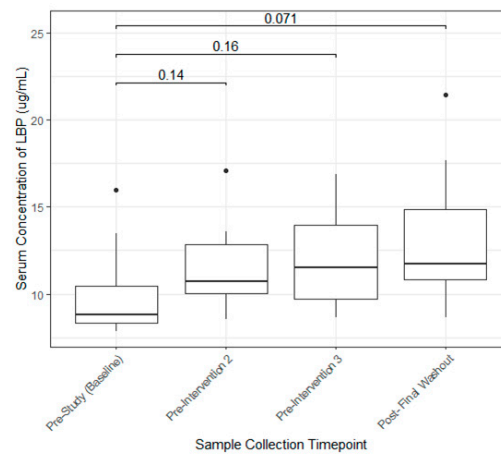

**Figure S4.** LBP concentrations (ug/mL) measured at Baseline, Pre-Intervention 2, Pre-Intervention 3, and Post-Final Washout. *P*-values are presented for paired *t*-test.

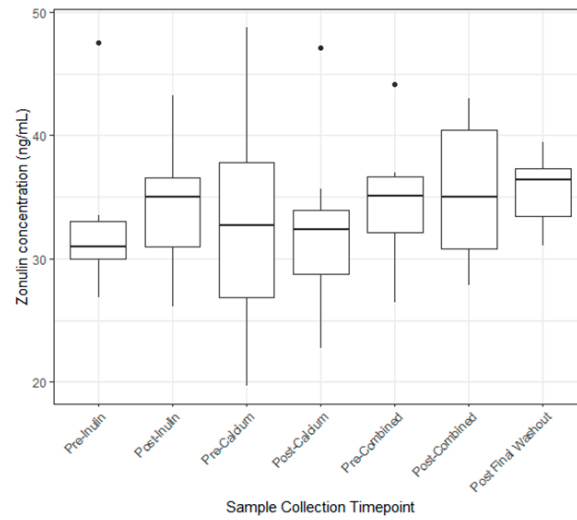

**Figure S5.** Zonulin concentrations (ng/mL) measured in serum at each sample collection time point. ( $n = 9$  for all sample collections except for Post Final Washout,  $n = 7$ , and Post-Inulin,  $n = 8$ , and Post-Calcium,  $n = 8$ ). No differences in concentration were noted (ANOVA,  $p = 0.93$ ).
